# Supplementary material for: Chromium(iii) stars and butterflies: synthesis, structural and magnetic studies of tetrametallic clusters
Source: Royal Society of Chemistry journal article supplement (doi:10.1039/c1dt10172b), 2011-01-01
Supplement: c1dt10172b.pdf [file c1dt10172b.pdf]

# Chromium(III) stars and butterflies: synthesis, structural and magnetic studies of tetra-metallic clusters: Supplementary Information

L. J. Batchelor, M. Sander, F. Tuna, M. Helliwell, F. Moro, J. van Slageren, E. Burzuri, O. Montero, M. Evangelisti, F. Luis and E. J. L. McInnes

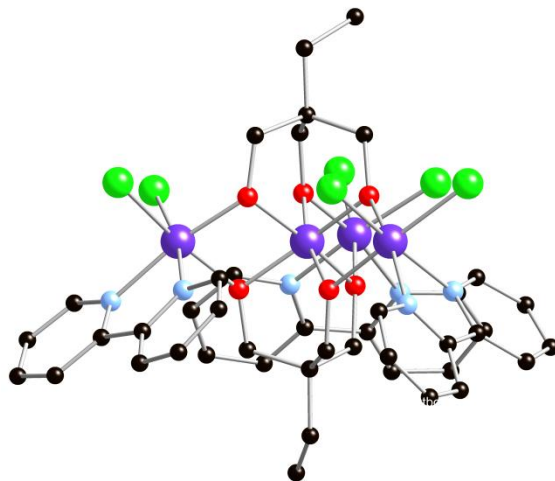

**Figure S1.** Structure of complex 2 viewed in the {Cr<sub>4</sub>} plane. Scheme as in Fig. 1.

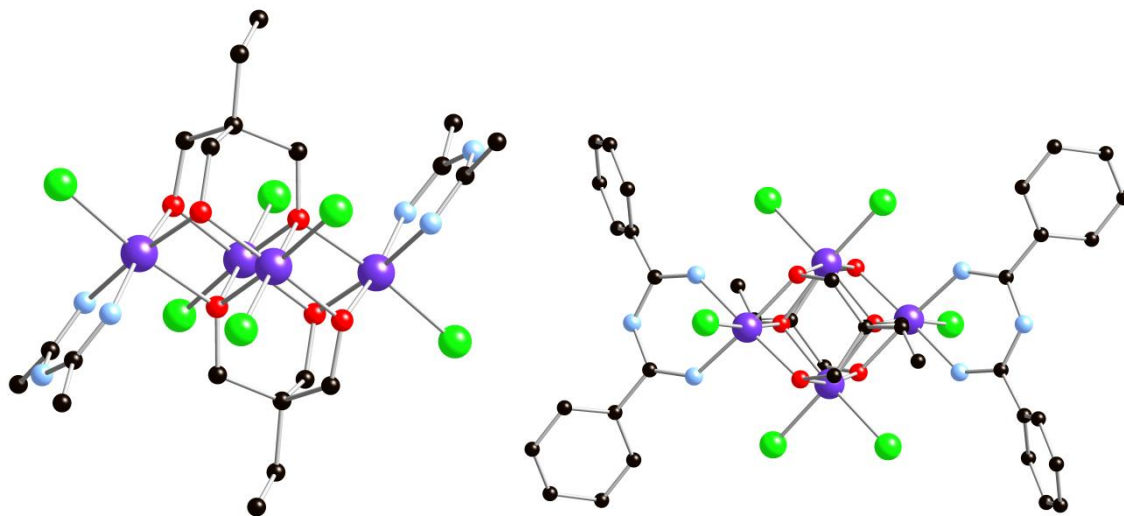

**Figure S2.** Views of the structures of complexes 5 (left) and 7 (right). Scheme as in Fig. 1.

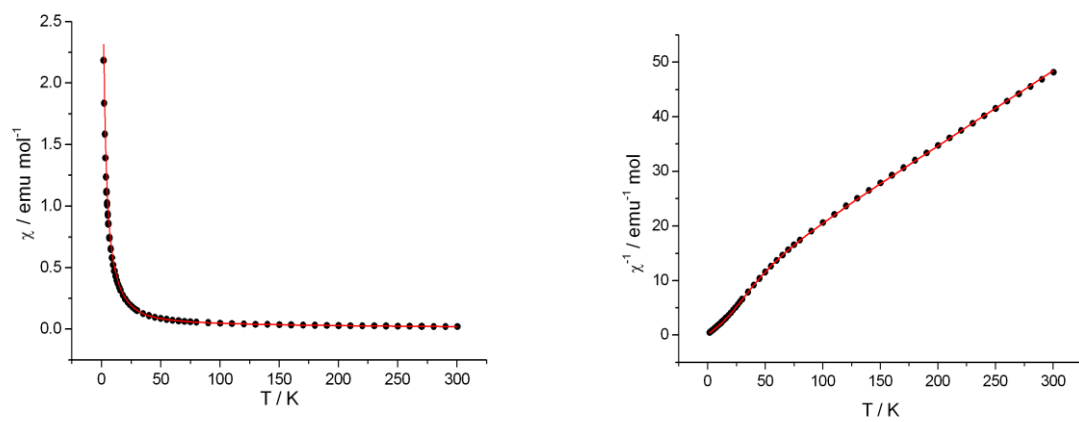

**Figure S3.**  $\chi(T)$  (left) and  $\chi^{-1}(T)$  (right) for **2**: experimental (data points) and calculated (red lines).

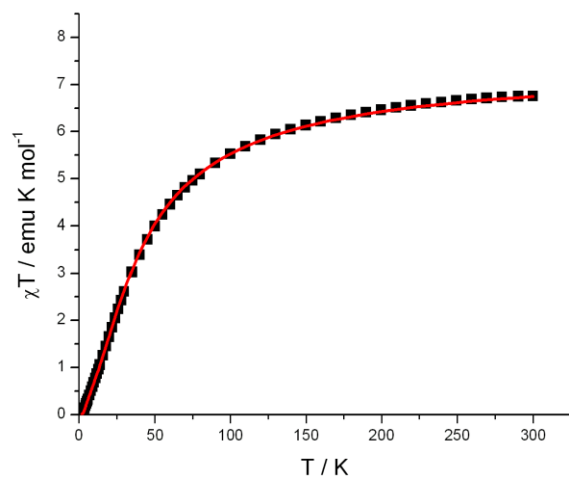

**Figure S4.**  $\chi T(T)$  for **7** in an applied field of 1.0 T: experimental (data points) and calculated (red line).
